# Supplementary material for: New insights into the early stages of silica-controlled barium carbonate crystallisation
Source: Royal Society of Chemistry journal article supplement (doi:10.1039/c4nr05436a), 2014-10-09
Supplement: c4nr05436a1.pdf [file c4nr05436a1.pdf]

## Electronic Supplementary Information

### New Insights into the Early Stages of Silica- Controlled Barium Carbonate Crystallisation

*Josef Eiblmeier,<sup>a</sup> Ulrich Schürmann,<sup>b</sup> Lorenz Kienle,<sup>b</sup>*

*Denis Gebauer,<sup>c</sup> Werner Kunz<sup>a</sup> and Matthias Kellermeier<sup>\*d</sup>*

<sup>a</sup> Institute of Physical and Theoretical Chemistry, University of Regensburg,  
Universitätsstrasse 31, D-93040 Regensburg, Germany

<sup>c</sup> Technical Faculty, Synthesis and Real Structure, Christian-Albrechts-University Kiel,  
Kaiserstrasse 2, D-24143 Kiel, Germany

<sup>c</sup> Physical Chemistry, University of Konstanz, Universitätsstrasse 10,  
D-78464 Konstanz, Germany

<sup>c</sup> Material Physics, BASF SE, Carl-Bosch-Strasse 38,  
D-67056 Ludwigshafen, Germany

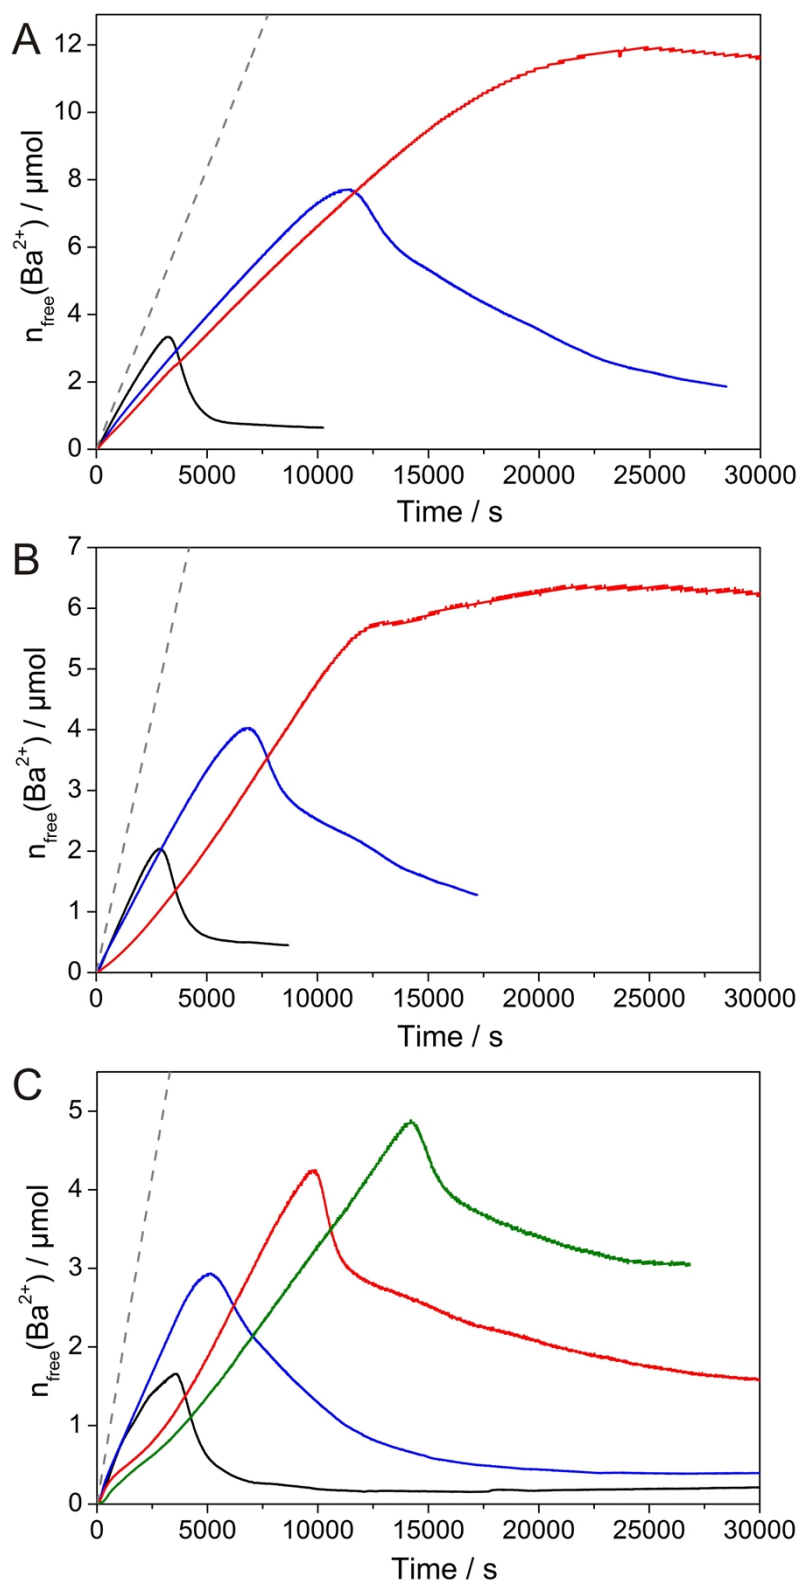

**Figure S1.** Time-dependent progressions of the amount of free  $\text{Ba}^{2+}$  detected upon titration of 10 mM  $\text{BaCl}_2$  into 5 mM carbonate buffer at pH (A) 10.0, (B) 10.5, and (C) 11.0 in the absence of silica (black curves) and in the presence of 300 (blue curves), 600 (red curves) and 1200 ppm  $\text{SiO}_2$  (green curve, only for pH 11). The dashed grey lines represent the dosed amount of  $\text{Ba}^{2+}$ .

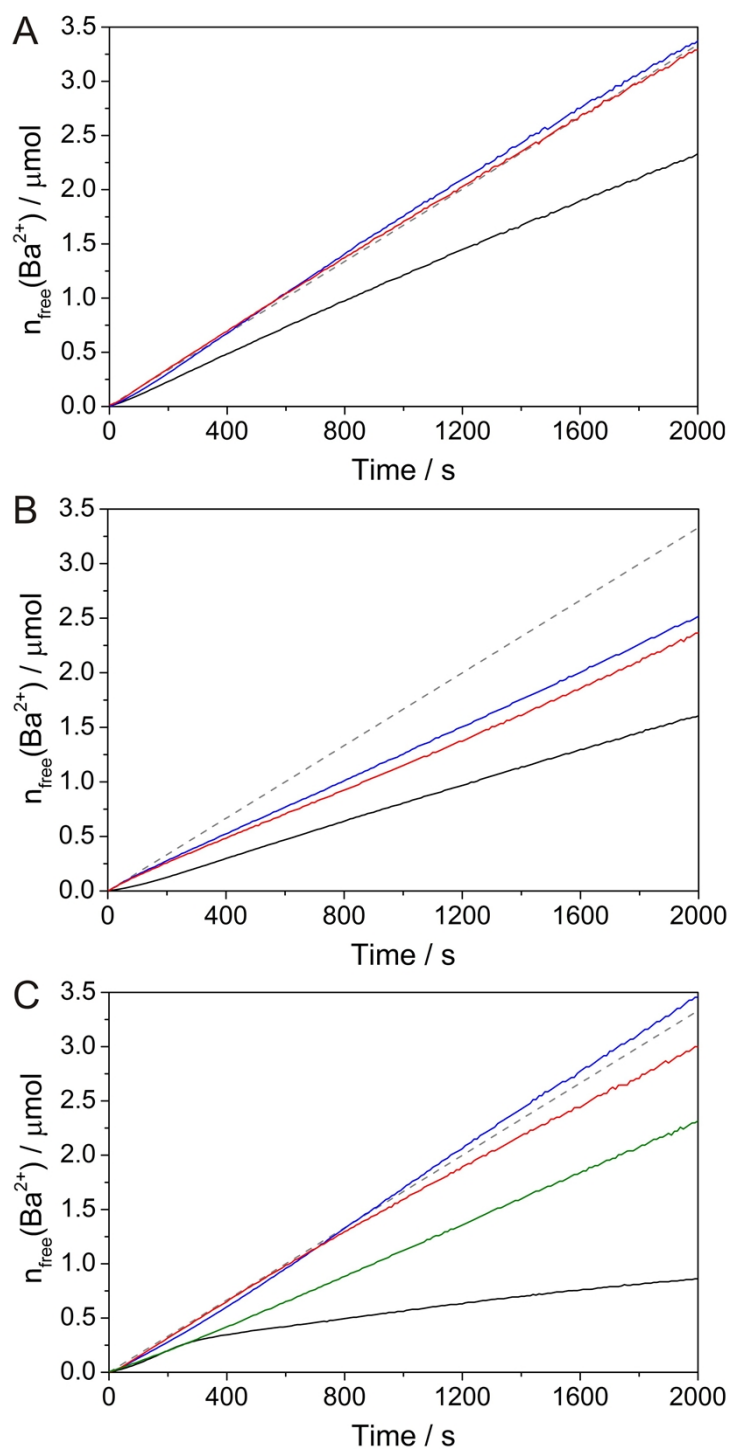

**Figure S2.** Amount of free  $\text{Ba}^{2+}$  traced during addition of 10 mM  $\text{BaCl}_2$  to neat sodium silicate solutions at pH (A) 10.0, (B) 10.5, and (C) 11.0, as compared to corresponding data obtained upon titration into carbonate buffers with no added silica at the same pH (black curves). The silica content in the solutions was 300 (blue curves), 600 (red curves) and 1200 ppm  $\text{SiO}_2$  (green curve, only for pH 11). The dashed grey lines represent the dosed amount of  $\text{Ba}^{2+}$ . Note that significant binding of barium ions by silicate species is only observed at pH 10.5 and at the highest silica concentration at pH 11, while in all other cases the detected free amount of  $\text{Ba}^{2+}$  more or less closely follows the dosed line.

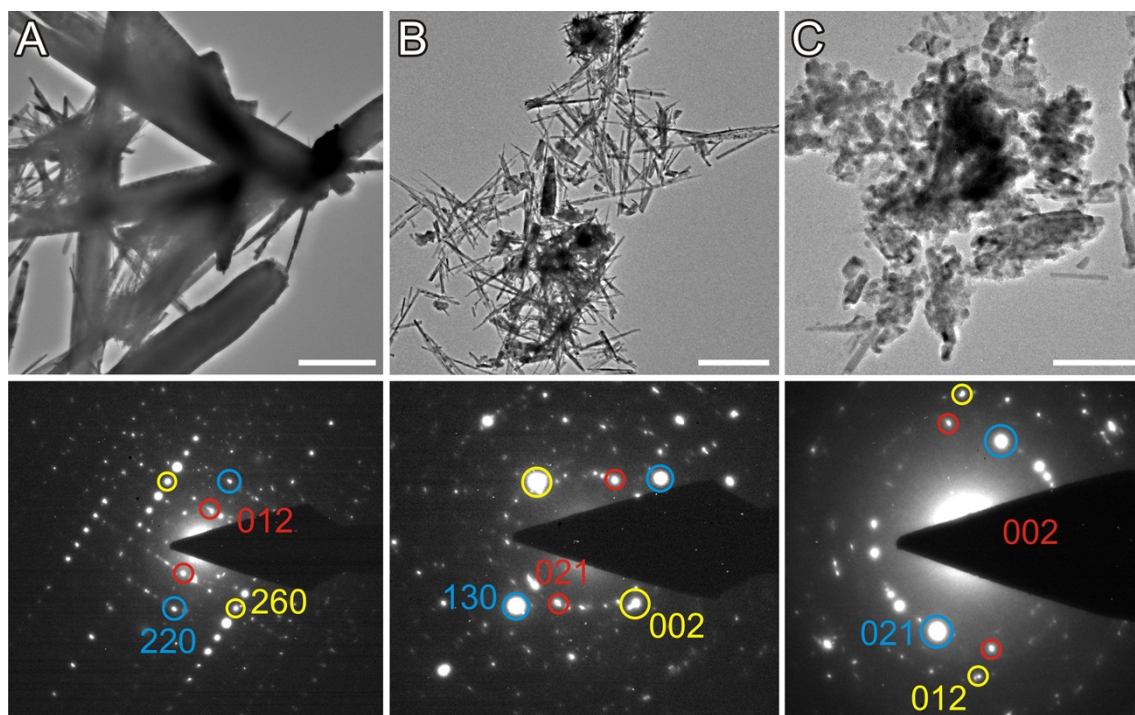

**Figure S3.** Additional TEM micrographs of crystals isolated from titration experiments performed at pH 10.0 in buffers containing (A) 0, (B) 300, and (C) 600 ppm SiO<sub>2</sub>. Reflections in the corresponding electron diffraction patterns shown below can be indexed to distinct crystallographic planes of the witherite structure, as indicated. Indexing was achieved by comparing measured d-spacings with database values.<sup>S1</sup> Scale bars are (A-B) 1 μm and (C) 200 nm.

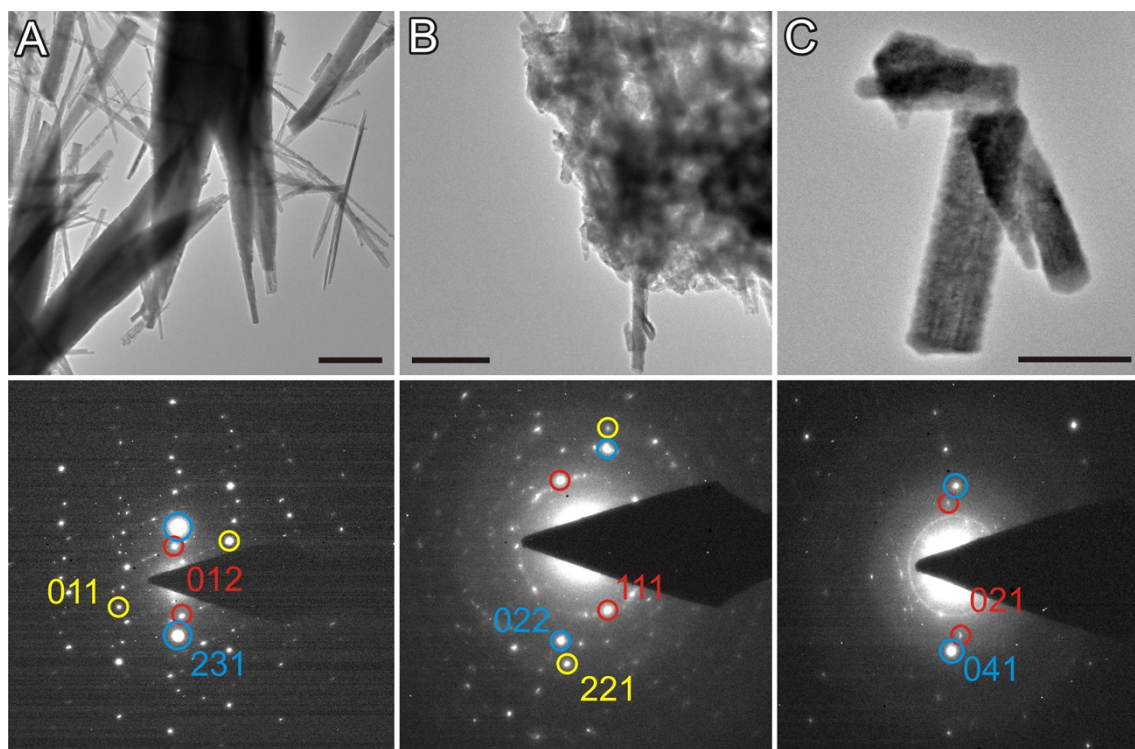

**Figure S4.** TEM images and ED patterns of crystalline products resulting from titration assays at pH 10.5 in the presence (A) 0, (B) 300, and (C) 600 ppm silicate. The highlighted reflections could be indexed to witherite planes as indicated. Scale bars are (A) 1  $\mu\text{m}$ , (B) 200 nm, and (C) 100 nm.

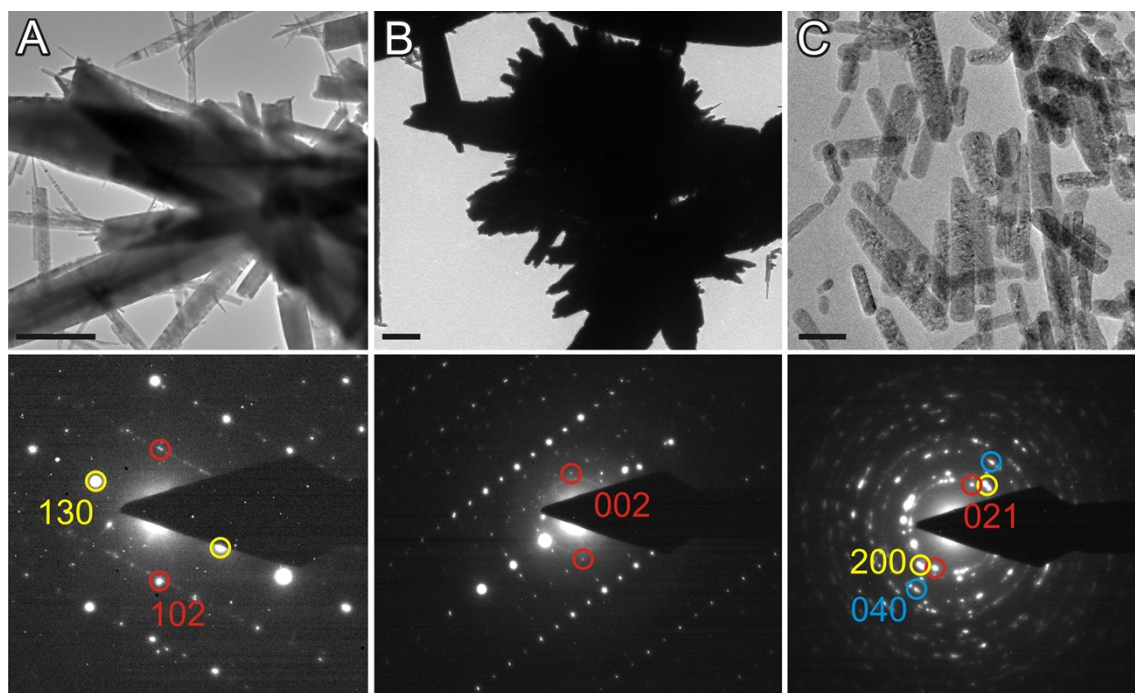

**Figure S5.** Supplementary TEM and electron diffraction data for particles generated in titration measurements at pH 11.0 in the absence of silicate (A) and under the influence of 300 (B) and 600 ppm  $\text{SiO}_2$  (C). ED patterns can all be indexed assuming crystalline witherite. Scale bars are (A-B) 1  $\mu\text{m}$ , and (C) 100 nm.



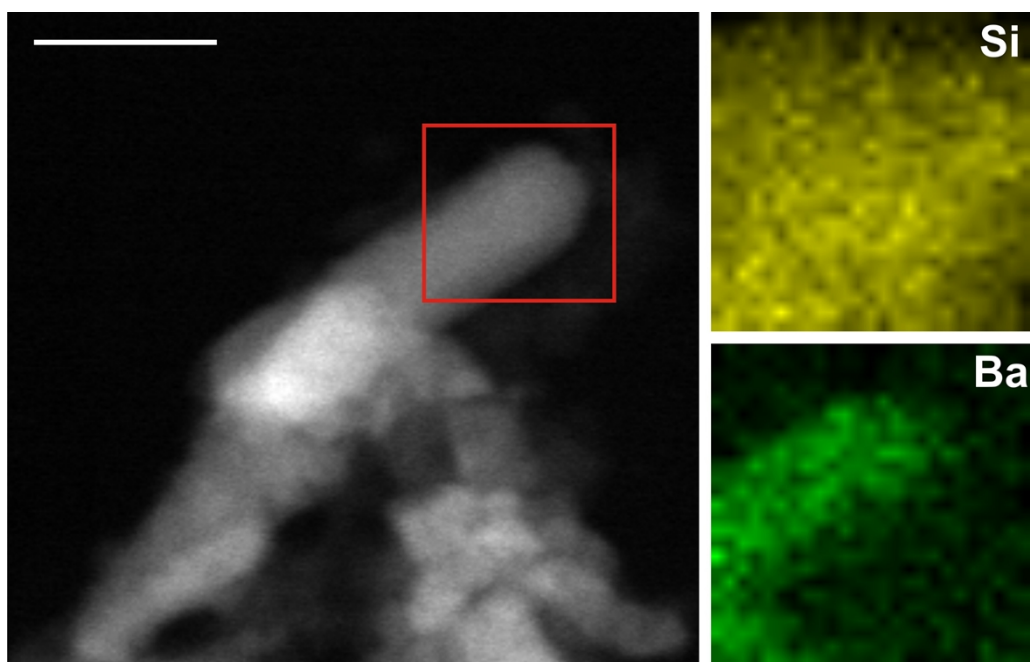

**Figure S6.** EDX mapping analysis of a crystal formed at pH 10.5 from a solution containing 300 ppm  $\text{SiO}_2$ . The investigated area is highlighted by the red rectangle in the corresponding STEM image (left). The resulting local distributions of Si (yellow) and Ba (green) suggest the presence of a continuous silica skin around the barium carbonate core. Scale bar: 50 nm.

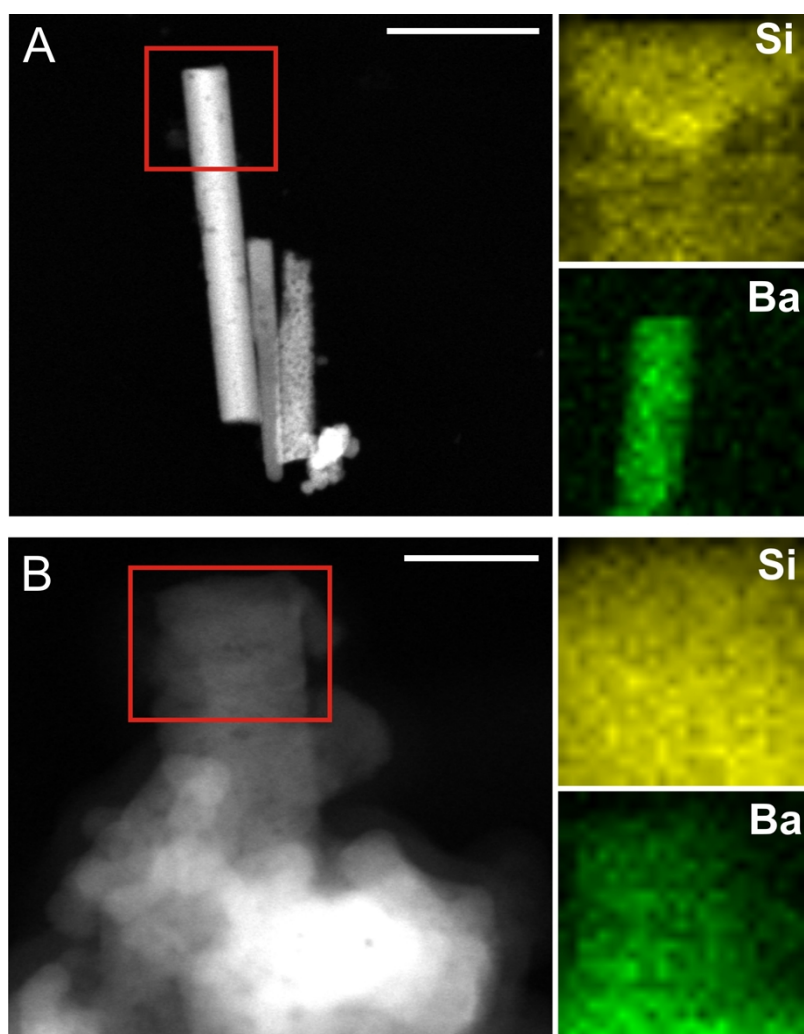

**Figure S7.** STEM images and corresponding EDX maps for relevant elements (Si and Ba), acquired from particles generated in titration experiments at pH 11.0 under the influence of (A) 600 and (B) 1200 ppm SiO<sub>2</sub>. Also at this pH level, a continuous matrix of silica can clearly be discerned around the crystalline BaCO<sub>3</sub> rods. Scale bars (A) 200 nm and (B) 50 nm.



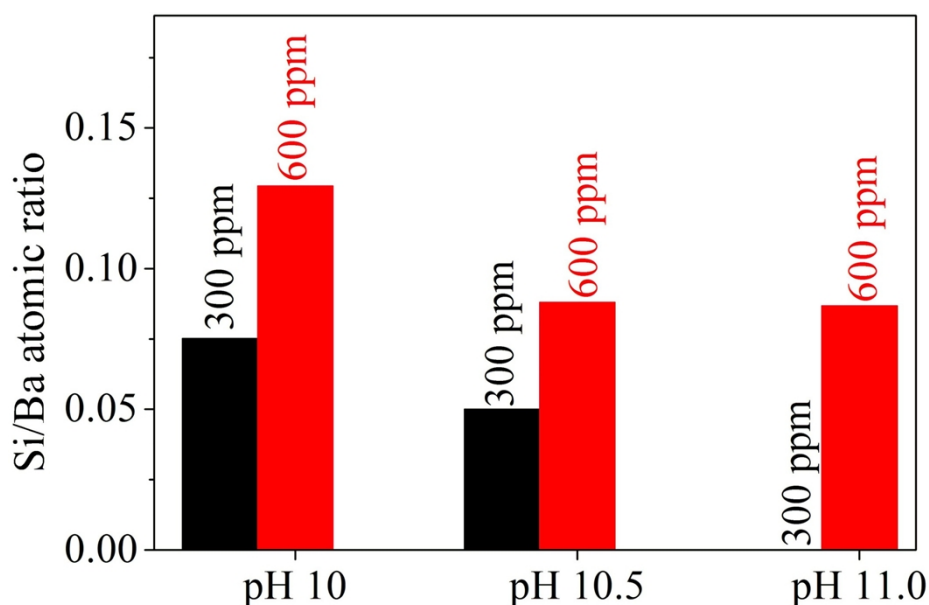

**Figure S8.** Si/Ba atomic ratios obtained by EDX spectroscopy from powder samples of particles formed in titration assays under different conditions (as indicated). Generally, the relative Si content in the precipitates increases with the silica concentration in solution, whereas it decreases with growing pH (both correlating inversely with the bulk solubility of silica). Note that at pH 11.0 and 300 ppm SiO<sub>2</sub>, there is no silica associated to the BaCO<sub>3</sub> crystals. In all other cases, the determined silica content is in the same range as reported for the building units of silica-witherite biomorphs.<sup>S2</sup>

## References

- [S1] J. P. R. de Villiers, *Am. Mineral.*, 1971, **56**, 758-766.
- [S2] M. Kellermeier, E. Melero-Garcia, F. Glaab, J. Eiblmeier, L. Kienle, R. Rachel, W. Kunz and J. M. Garcia-Ruiz, *Chem. Eur. J.*, 2012, **18**, 2272-2282.
